# Supplementary material for: mMaple: A Photoconvertible Fluorescent Protein for Use in Multiple Imaging Modalities
Source: PLoS One. 2012 Dec 11;7(12):e51314. doi: 10.1371/journal.pone.0051314 (PMC3519878; doi:10.1371/journal.pone.0051314)
Supplement: Table S1 — Characterization of photobleaching rates for pcFP-H2B fusions in live cells. (DOC) [file pone.0051314.s012.doc]

|  |  | **Time to bleach to 50% of initial intensity (s)** | |
| --- | --- | --- | --- |
| **Protein name** | **State** | **Widefield imaging conditionsa** | **Confocal imaging conditionsb** |
| mMaple | green | 65.1 | 9.4 |
| mMaple | red | 180.3 | 133.2 |
| mClavGR2 | green | 69.7 | 4.6 |
| mClavGR2 | red | 241.2 | 206.3 |
| mEos2 | green | 4.6 | 2.7 |
| mEos2 | red | 205.8 | 55.1 |

aWidefield photobleaching of both states was performed at an output power of 11.4 mW/cm². bConfocal photobleaching of both states was performed at an output power of 120 W. All photobleaching curves are provided in Supplementary Fig. S4 and S5. We have previously reported [31] widefield (at 202.6 mW/cm² and 489.9 mW/cm² for green and red, respectively) and confocal (at 100 W for both green and red) photobleaching times for mClavGR2 and mEos2 using units of “time to photobleach from 1000 to 500 photons/second/molecule”. We have since observed that the relative order of photobleaching half-times for different variants can change as a function of power. Accordingly, the numbers provided here are only relevant for the output power at which they were measured.
